# Supplementary material for: [Ag15(N-triphos)4(Cl4)](NO3)3: a stable Ag–P superatom with eight electrons (N-triphos = tris((diphenylphosphino)methyl)amine)
Source: Royal Society of Chemistry journal article supplement (doi:10.1039/c7nr07308a), 2017-12-01
Supplement: c7nr07308a1.pdf [file c7nr07308a1.pdf]

## **[Ag<sub>15</sub>(N-triphos)<sub>4</sub>(Cl<sub>4</sub>)](NO<sub>3</sub>)<sub>3</sub>: A Stable Ag-P Superatom with Eight-Electrons (N-triphos = Tris((diphenylphosphino)methyl)amine)**

Xue-Tao Shen, Xue-Li Ma, Qing-Ling Ni, Meng-Xia Ma, Liu-Cheng Gui, Cheng Hou, Ruo-Bing Hou, Xiu-Jian Wang

### **Experiment Section**

All reagents were purchased from commercial sources and used without further purification. Ligand N-triphos was prepared according to the reference (P. W. Miller and A. J. P. White, *J. Organomet. Chem.* 2010, 695, 1138–1145).

#### **Synthesis of [Ag<sub>15</sub>(N-triphos)<sub>4</sub>(Cl<sub>4</sub>)](NO<sub>3</sub>)<sub>3</sub>·8H<sub>2</sub>O:**

30mg (0.05mmol) N,N,N-tris(diphenylphosphinomethyl)amine in 3.0 mL MeOH was added to the solution of 60 mg (0.35mmol) AgNO<sub>3</sub> in 0.5 mL of deionized water, and the resulting reaction solution was stirred at room temperature using a magnetic stirrer. After 20 minutes, a fresh solution of 20 mg (0.53mmol) of NaBH<sub>4</sub> in 6.0 mL of MeOH was added into this reaction solution. And then the resulting reaction mixture was stirred continuously for over 20h at room temperature. After that, the solvents were removed by rotary evaporation at room temperature. The dried product was extracted by 7 mL of CHCl<sub>3</sub> and then the extracted mixture was centrifuged for 1min at 6000r/min. The dark red supernatant was filtrated and the filtration was diffused slowly by ether through the vapor phase. Dark sheet crystals were afforded in one week. Yield: 11.35 mg, 10.8% based on Ag<sup>+</sup> ion. Elemental analysis calcd (%) for C<sub>156</sub>H<sub>160</sub>Ag<sub>15</sub>Cl<sub>4</sub>N<sub>7</sub>O<sub>17</sub>P<sub>12</sub>: C 41.30, H 3.55, N 2.16; found: C 41.58, H 3.91, N 2.42.

**Note:** Following the aforementioned procedure, the compound **1** can also be obtained by using NaBD<sub>4</sub>, CD<sub>3</sub>OD and D<sub>2</sub>O instead of NaBH<sub>4</sub>, CH<sub>3</sub>OH and H<sub>2</sub>O, respectively.

#### **Physical measurements**

IR spectra were recorded as KBr pellets on a Perkin-Elmer FT-IR spectrometer in the range 4000–450 cm<sup>-1</sup>. Elemental analyses were performed with a Carlo ERBA 1106 analyzer. Powder X-ray diffraction (PXRD) data were collected on a Rigaku D/Max 2500 diffractometer (CuKα, λ = 1.5418 Å). UV-vis spectra were recorded using a Cary series UV-Vis spectrometer. High resolution mass spectra were recorded using a Thermo Exactive in positive ion mode, the capillary temperature: 350°C; the capillary voltage: 57.5 V; the tube lens voltage: 160V; the skimmer voltage: 20 V. X-ray Photoelectron Spectroscopy (XPS) was carried out using a monochromatic Al Kα (1486.69 eV) X-ray source operated on ESCALAB 250Xi, and the spectra were calibrated using the C 1s peak at 284.5 eV.

Crystal data and experimental details for **1** were given in Table S1. X-ray Diffraction data of complex **1** were obtained at 1W1A, Beijing Synchrotron Radiation Facility (λ = 0.72 Å) at 107 K. All calculations were performed with Olex2 crystallographic software package. The structure was solved by the standard direct method and refined in the anisotropic approximation. The diffraction

data of **1** was not enough good since the crystal was sheet. Therefore all phenyl rings on N-triphos were not standard and had to be fixed theoretically. Counter anions NO<sub>3</sub><sup>-</sup> and solvent molecules were seriously disorder and couldn't be determined directly by the structure refinement. The number of counter anion NO<sub>3</sub><sup>-</sup> was determined by elemental analysis and confirmed by ESI-MS. Hydrogen atoms were generated theoretically onto the specific atoms and refined isotropically with fixed thermal factors. The final refinements had been carried out with SQUEEZE data. The crystal data has been deposited to the Cambridge Structural Database and the CCDC number: 1576513.

**Table S1** Crystal data and structure refinement for **1**

|                                                        |                                                                                                                            |
|--------------------------------------------------------|----------------------------------------------------------------------------------------------------------------------------|
| Empirical formula                                      | C <sub>156</sub> H <sub>144</sub> Ag <sub>15</sub> Cl <sub>4</sub> N <sub>7</sub> O <sub>9</sub> P <sub>12</sub> ·xsolvent |
| Crystal system                                         | orthorhombic                                                                                                               |
| Space group                                            | <i>C</i> 222 <sub>1</sub>                                                                                                  |
| <i>a</i> (Å)                                           | 18.702(4)                                                                                                                  |
| <i>b</i> (Å)                                           | 36.975(7)                                                                                                                  |
| <i>c</i> (Å)                                           | 28.652(6)                                                                                                                  |
| $\alpha$ (°)                                           | 90                                                                                                                         |
| $\beta$ (°)                                            | 90                                                                                                                         |
| $\gamma$ (°)                                           | 90                                                                                                                         |
| Volume (Å <sup>3</sup> )                               | 19813(7)                                                                                                                   |
| <i>Z</i>                                               | 4                                                                                                                          |
| $\rho_{calc}$ (g/cm <sup>3</sup> )                     | 1.410                                                                                                                      |
| $\mu$ (mm <sup>-1</sup> )                              | 1.669                                                                                                                      |
| $\theta$ range for data collection                     | 2.469 to 25.057                                                                                                            |
| Reflections collected                                  | 30936                                                                                                                      |
| Independent reflections                                | 16793                                                                                                                      |
| Data/restraints/parameters                             | 16793 / 1140 / 730                                                                                                         |
| Goodness of fit ( GOF )                                | 1.070                                                                                                                      |
| Final R indices [ <i>I</i> > 2 $\sigma$ ( <i>I</i> ) ] | 0.0973                                                                                                                     |
| R indices ( all data )                                 | 0.1132                                                                                                                     |
| Largest diff. peak / hole /eÅ <sup>-3</sup>            | 3.463/-3.608                                                                                                               |

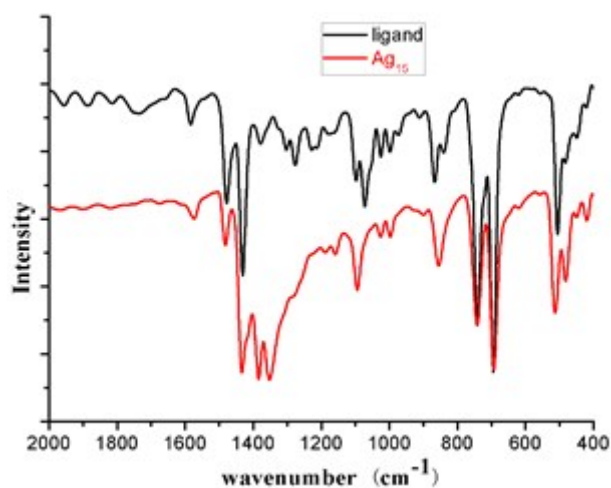

**Fig. S1** IR spectra of ligand N-triphos and  $[\text{Ag}_{15}(\text{N-triphos})_4(\text{Cl}_4)](\text{NO}_3)_3$ .

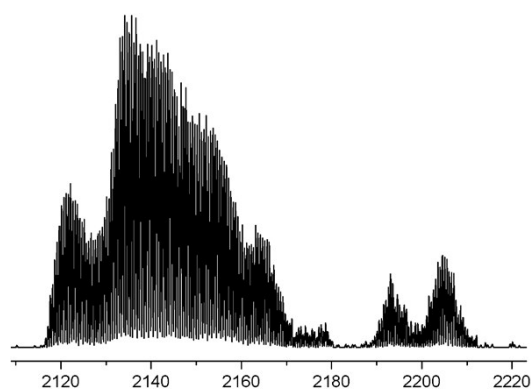

**Fig. S2** Positive-ion mode ESI-MS of single crystal of  $[\text{Ag}_{15}(\text{N-triphos})_4(\text{Cl}_4)](\text{NO}_3)_3$  in  $\text{CH}_3\text{OH}$ , showing some overlapped peaks at 2120~2220.

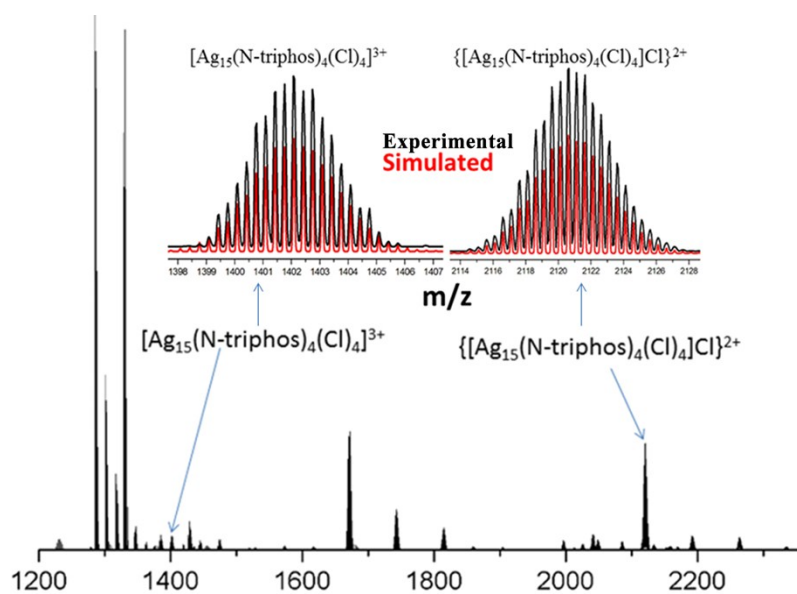

**Fig. S3** Positive-ion mode ESI-MS of  $[\text{Ag}_{15}(\text{N-triphos})_4(\text{Cl}_4)](\text{NO}_3)_3$  cluster mixed with the excess KCl in  $\text{CH}_3\text{OH}$  solution, showing molecular ion peaks of  $[\text{Ag}_{15}(\text{N-triphos})_4(\text{Cl}_4)]^{3+}$  and  $\{[\text{Ag}_{15}(\text{N-triphos})_4(\text{Cl}_4)]\text{Cl}\}^{2+}$ .

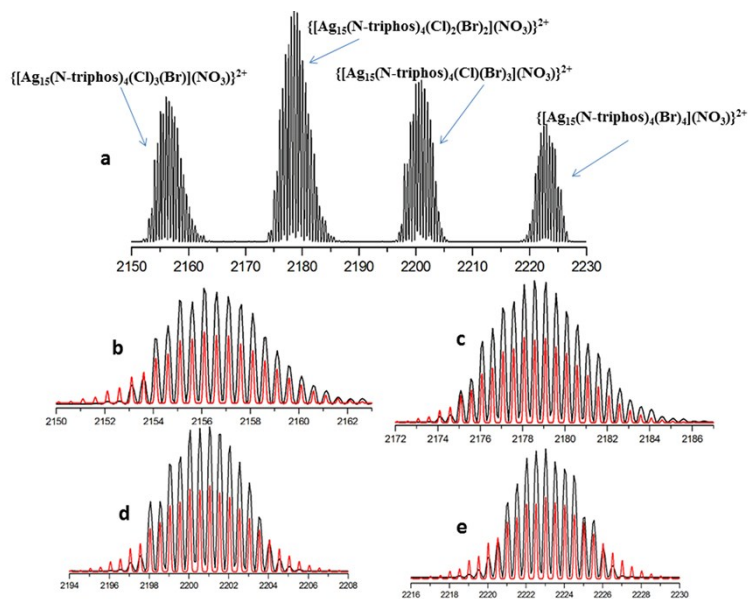

**Fig. S4** (a) Positive-ion mode ESI-MS of  $[\text{Ag}_{15}(\text{N-triphos})_4(\text{Cl}_4)](\text{NO}_3)_3$  cluster mixed with the excess KBr in  $\text{CH}_3\text{OH}$  solution, exhibiting anion exchange behaviors. (b-c) showing a good agreement of experimental (black) and simulated (red) mass spectra of  $\{[\text{Ag}_{15}(\text{N-triphos})_4(\text{Cl})_3(\text{Br})](\text{NO}_3)\}^{2+}$ ,  $\{[\text{Ag}_{15}(\text{N-triphos})_4(\text{Cl})_2(\text{Br})_2](\text{NO}_3)\}^{2+}$ ,  $\{[\text{Ag}_{15}(\text{N-triphos})_4(\text{Cl})(\text{Br})_3](\text{NO}_3)\}^{2+}$  and  $\{[\text{Ag}_{15}(\text{N-triphos})_4(\text{Br})_4](\text{NO}_3)\}^{2+}$ , respectively.

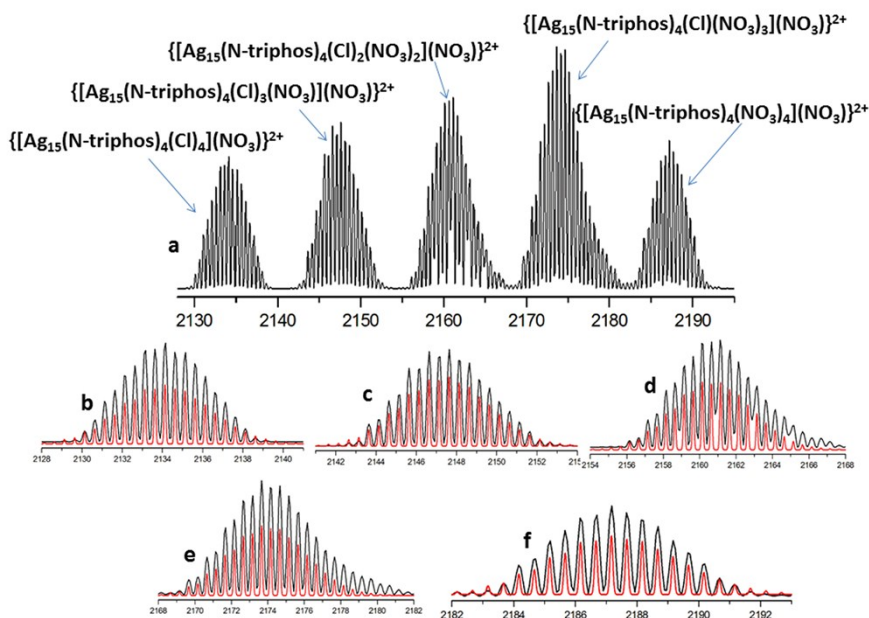

**Fig. S5** (a) Positive-ion mode ESI-MS of  $[\text{Ag}_{15}(\text{N-triphos})_4(\text{Cl}_4)](\text{NO}_3)_3$  cluster mixed with the excess  $\text{KNO}_3$  in  $\text{CH}_3\text{OH}$  solution. (b-f) showing a good agreement of experimental (black) and simulated (red) mass spectra of  $\{[\text{Ag}_{15}(\text{N-triphos})_4(\text{Cl})_4](\text{NO}_3)\}^{2+}$ ,  $\{[\text{Ag}_{15}(\text{N-triphos})_4(\text{Cl})_3(\text{NO}_3)](\text{NO}_3)\}^{2+}$ ,  $\{[\text{Ag}_{15}(\text{N-triphos})_4(\text{Cl})_2(\text{NO}_3)_2](\text{NO}_3)\}^{2+}$ ,  $\{[\text{Ag}_{15}(\text{N-triphos})_4(\text{Cl})(\text{NO}_3)_3](\text{NO}_3)\}^{2+}$   $\{[\text{Ag}_{15}(\text{N-triphos})_4(\text{NO}_3)_4](\text{NO}_3)\}^{2+}$ , respectively.

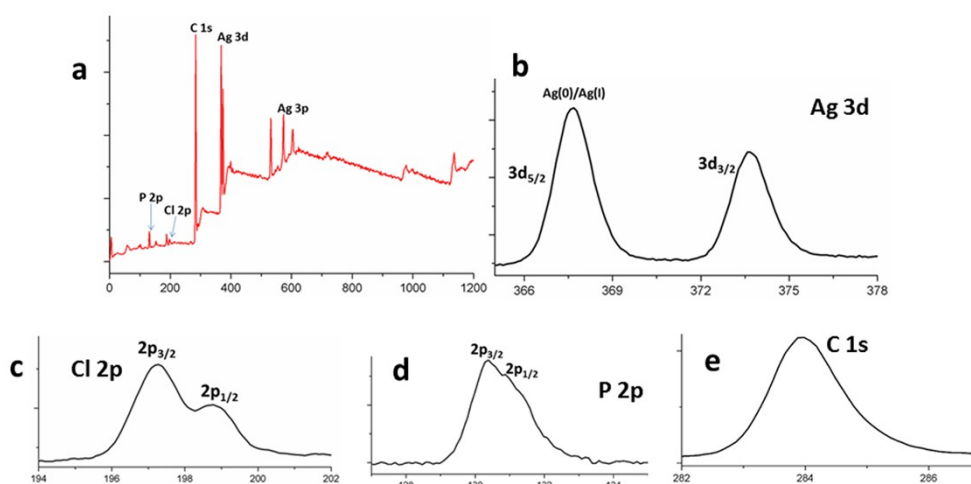

**Fig. S6** XPS spectra of  $[Ag_{15}(N\text{-triphos})_4(Cl_4)](NO_3)_3$  cluster. (a) Survey spectrum, showing all the expected elements (Ag, P, Cl and C). (b-e) Specific regions of Ag 3d, Cl 2p, P 2p and C 1s, respectively.

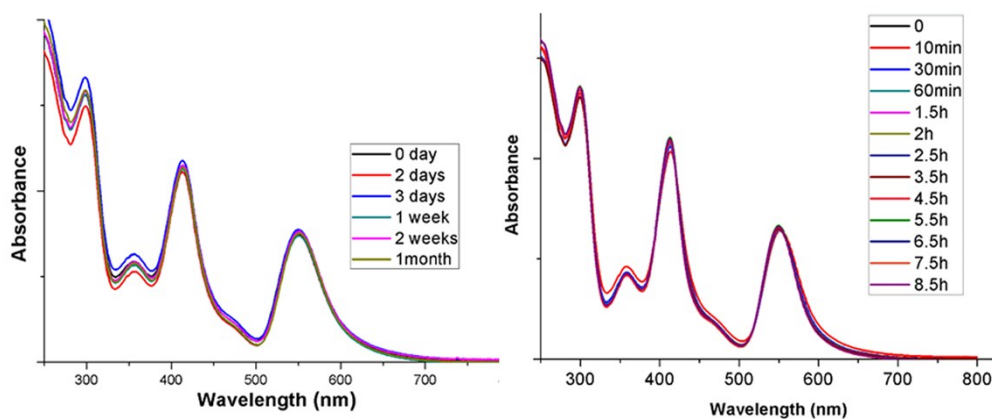

**Fig. S7** UV-vis spectra of  $[Ag_{15}(N\text{-triphos})_4(Cl_4)](NO_3)_3$  cluster in  $CH_3OH$  ( $2.5 \times 10^{-5} \text{ mol}\cdot\text{L}^{-1}$ ) monitored with time, checking the time-dependent ambient stability of cluster in  $CH_3OH$  in dark (a) and in natural light (b).

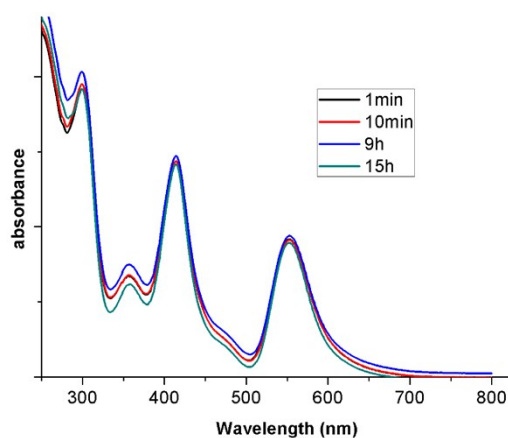

**Fig. S8** UV-vis spectra of  $[Ag_{15}(N\text{-triphos})_4(Cl_4)](NO_3)_3$  cluster in  $CH_3OH$  ( $2.5 \times 10^{-5} \text{ mol}\cdot\text{L}^{-1}$ ) at  $50^\circ\text{C}$  in dark, monitored with time.

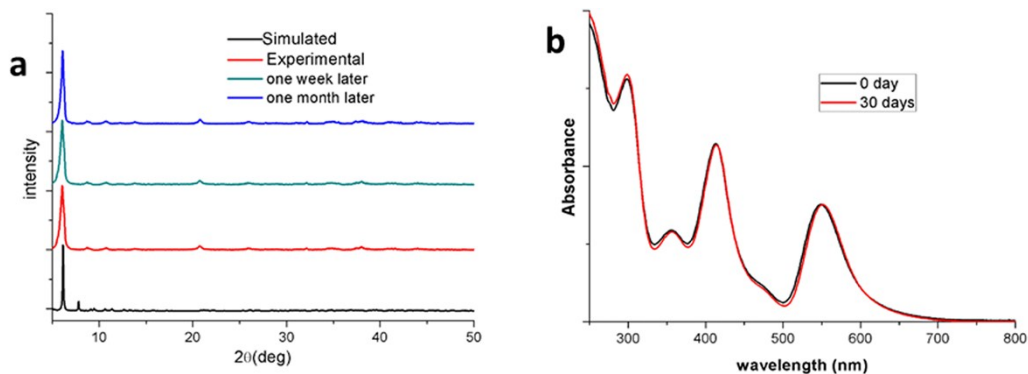

**Fig. S9** Monitoring the time-dependent ambient stability of  $[\text{Ag}_{15}(\text{N-triphos})_4(\text{Cl}_4)](\text{NO}_3)_3$  cluster as a solid. (a) Powder X-ray diffraction data; (b) UV-vis spectra, the solid-state cluster was dissolved in  $\text{CH}_3\text{OH}$  for recording the UV-vis spectra. Solid-state samples were stored in natural light.

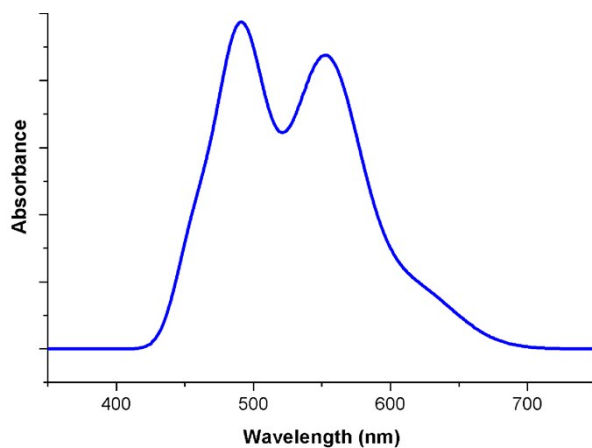

**Fig. S10** the simulation of UV-vis spectrum of 1 by TD-DFT

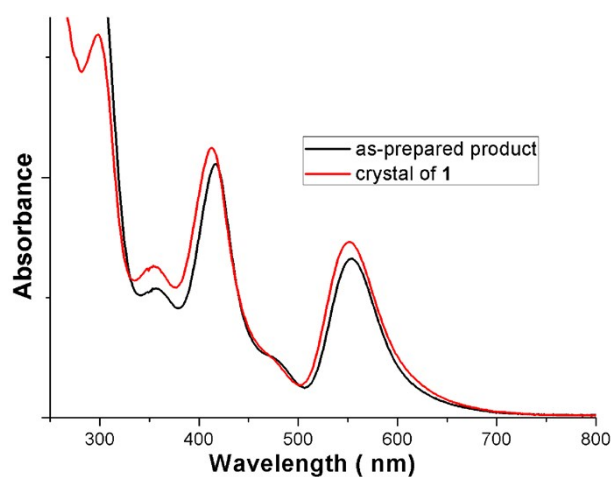

**Fig. S11** UV-vis spectra of the as-prepared product and the crystal of 1 in  $\text{CHCl}_3$ .

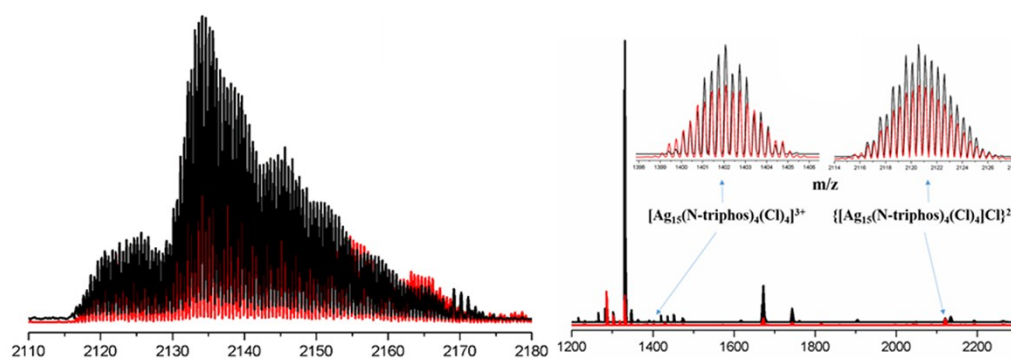

**Fig. S12** the Positive-ion mode ESI-MS spectra of nanocluster **1** by using  $[\text{BH}_4]^-$  (red) and  $[\text{BD}_4]^-$  (black). (a) showing an almost identical ESI-MS spectra of **1** in methanol at 2110~2180. (b) showing an almost identical ESI-MS spectra of **1** at 1200~2200 with the excess of KCl in methanol, inset: the ESI-MS spectra of  $[\text{Ag}_{15}(\text{N-triphos})_4(\text{Cl})_4]^{3+}$  and  $\{[\text{Ag}_{15}(\text{N-triphos})_4(\text{Cl})_4]\text{Cl}\}^{2+}$ .

### Computational Details

All the calculations were performed via Gaussian 16 program<sup>[1]</sup>. In order to reduce the expense of computation, the structure of  $[\text{Ag}_{15}(\text{N-triphos})_4(\text{Cl})_4]^{3+}$  is simplified. The phenyl group was replaced by hydrogen atom. Density functional theory (DFT) calculation at the hybrid Becke, three-parameter Lee-Yang (B3LYP) level<sup>[2]</sup> was carried out to optimize the structure of the model complex. The def2-SVP basis set<sup>[3]</sup> was selected as a compromise of reasonable accuracy and computational effort. The UV-visible absorption spectra of the complexes were investigated using TD-DFT calculations at TPSSH<sup>4</sup>/def2-TZVP level based on the simplified model complex.

### References

1. Gaussian 09, Revision A.02, M. J. Frisch, G. W. Trucks, H. B. Schlegel, G. E. Scuseria, M. A. Robb, J. R. Cheeseman, G. Scalmani, V. Barone, G. A. Petersson, H. Nakatsuji, X. Li, M. Caricato, A. Marenich, J. Bloino, B. G. Janesko, R. Gomperts, B. Mennucci, H. P. Hratchian, J. V. Ortiz, A. F. Izmaylov, J. L. Sonnenberg, D. Williams-Young, F. Ding, F. Lipparini, F. Egidi, J. Goings, B. Peng, A. Petrone, T. Henderson, D. Ranasinghe, V. G. Zakrzewski, J. Gao, N. Rega, G. Zheng, W. Liang, M. Hada, M. Ehara, K. Toyota, R. Fukuda, J. Hasegawa, M. Ishida, T. Nakajima, Y. Honda, O. Kitao, H. Nakai, T. Vreven, K. Throssell, J. A. Montgomery, Jr., J. E. Peralta, F. Ogliaro, M. Bearpark, J. J. Heyd, E. Brothers, K. N. Kudin, V. N. Staroverov, T. Keith, R. Kobayashi, J. Normand, K. Raghavachari, A. Rendell, J. C. Burant, S. S. Iyengar, J. Tomasi, M. Cossi, J. M. Millam, M. Klene, C. Adamo, R. Cammi, J. W. Ochterski, R. L. Martin, K. Morokuma, O. Farkas, J. B. Foresman, and D. J. Fox, Gaussian, Inc., Wallingford CT, 2016.
2. C. Lee, W. Yang, R. G. Parr, Development of the Colle-Salvetti correlation-energy formula into a functional of the electron density[J]. Physical review B, 1988, 37(2): 785.
3. F. Weigend, R. Ahlrichs, Balanced basis sets of split valence, triple zeta valence and quadruple zeta valence quality for H to Rn: Design and assessment of accuracy[J]. Physical Chemistry Chemical Physics, 2005, 7(18): 3297-3305.

4. J. Tao, J. P. Perdew, V. N. Staroverov, et al. Climbing the density functional ladder: Nonempirical meta-generalized gradient approximation designed for molecules and solids [J]. Physical Review Letters, 2003, 91(14): 146401.

Cartesian coordinates of the optimized geometry

|    |             |             |             |
|----|-------------|-------------|-------------|
| Ag | 0.00018000  | -0.21704500 | -0.26586100 |
| Ag | 2.12406300  | -1.17716700 | -1.59529000 |
| Ag | 1.72135400  | 1.98886100  | -0.74798100 |
| Ag | -1.23253700 | 2.01471200  | -1.13781700 |
| Ag | 1.66870300  | -2.00974400 | 1.09354100  |
| Ag | 0.02842600  | -3.05289800 | -1.24721200 |
| Ag | 0.38623200  | 0.77225400  | -3.19571700 |
| Ag | 0.03136200  | 3.51507300  | 1.06800200  |
| Ag | 3.92931300  | -0.06614800 | 0.41030800  |
| Cl | 4.11351200  | 1.89377300  | -1.51808400 |
| Cl | 1.98309500  | -2.67776100 | 3.46311700  |
| P  | 1.78494300  | -4.09482800 | -3.14340900 |
| P  | 2.46022400  | 0.31856800  | -4.72818500 |
| P  | 5.46330600  | -1.49678900 | -1.25192400 |
| P  | -1.22362300 | 2.67838300  | -4.45062800 |
| P  | -0.99883800 | 5.39175800  | -0.44161700 |
| P  | -4.78326500 | 2.33162000  | -1.05309200 |
| N  | 3.58727700  | -1.90411200 | -3.36721200 |
| N  | -2.58554100 | 3.78097500  | -2.18019500 |
| C  | 2.87591700  | -2.93275400 | -4.15882700 |
| H  | 3.57308100  | -3.51429200 | -4.78960400 |
| H  | 2.17077900  | -2.43190600 | -4.83897000 |
| C  | 3.93376300  | -0.72216100 | -4.18676100 |
| C  | 4.79139400  | -2.47511500 | -2.72058400 |
| C  | -1.91536400 | 4.12853600  | -3.45729300 |
| H  | -1.03353800 | 4.74641300  | -3.23407600 |
| H  | -2.57856200 | 4.73709800  | -4.09946400 |
| C  | -2.62438100 | 4.95867100  | -1.27895500 |
| H  | -3.29365300 | 4.73582700  | -0.43601100 |
| H  | -3.02734000 | 5.84504700  | -1.80321900 |
| C  | -3.96070600 | 3.29725800  | -2.44289300 |
| H  | -3.93664900 | 2.59128300  | -3.28611900 |
| H  | -4.62104700 | 4.13383500  | -2.73880300 |
| Ag | -1.91685800 | -1.77529500 | 0.88491300  |
| Ag | -1.76260100 | 0.92689600  | 1.69125000  |
| Ag | 1.23329600  | 0.90652800  | 1.89920100  |
| Ag | -1.82264800 | -0.81430200 | -2.23442600 |
| Ag | -0.43464500 | -1.23474500 | 3.30440900  |
| Ag | -3.94003600 | 0.05144300  | -0.30135900 |



|    |             |             |             |
|----|-------------|-------------|-------------|
| Cl | -2.43992100 | 3.27921300  | 2.24034000  |
| Cl | -4.12958600 | -1.67707300 | -2.52729400 |
| P  | -1.84172900 | -4.78960500 | -0.79844900 |
| P  | -1.89169300 | -3.37698100 | 3.81588200  |
| P  | -5.33187000 | -1.78938200 | 0.88788200  |
| P  | 0.36995300  | 0.20512500  | 5.30174400  |
| P  | 1.69223200  | 4.25260100  | 2.91427900  |
| P  | 4.65563600  | 0.36377800  | 2.81883300  |
| N  | -3.33403300 | -3.74742000 | 1.39603600  |
| N  | 2.38847500  | 1.69187800  | 3.93115700  |
| C  | -2.69053200 | -4.97130000 | 0.87178700  |
| H  | -3.40753500 | -5.81204700 | 0.82452400  |
| H  | -1.88641800 | -5.27538600 | 1.55836800  |
| C  | -3.46022000 | -3.81806800 | 2.87077100  |
| C  | -4.65498600 | -3.53773900 | 0.75740200  |
| C  | 1.41352000  | 1.74924600  | 5.04268400  |
| H  | 0.67902200  | 2.53858600  | 4.82382000  |
| H  | 1.90871800  | 2.01791700  | 5.99519800  |
| C  | 2.92884300  | 3.03986600  | 3.65555300  |
| H  | 3.71963000  | 2.95558400  | 2.89511100  |
| H  | 3.38698700  | 3.48594400  | 4.55870600  |
| C  | 3.47066000  | 0.72935700  | 4.23339000  |
| H  | 3.02228200  | -0.25195500 | 4.45388300  |
| H  | 4.05925900  | 1.04679200  | 5.11521000  |
| H  | -5.40002200 | -4.26229300 | 1.13492200  |
| H  | -4.55541400 | -3.68996300 | -0.32728200 |
| H  | 4.52958500  | -0.03089000 | -3.57284200 |
| H  | 4.53211700  | -1.00200600 | -5.07400100 |
| H  | 5.59943200  | -2.64451600 | -3.45639700 |
| H  | 4.52642100  | -3.45696500 | -2.30236400 |
| H  | -4.19763600 | -3.07115600 | 3.19830200  |
| H  | -3.83942000 | -4.80474100 | 3.19520300  |
| H  | 6.37863700  | -2.48424000 | -0.79882600 |
| H  | 6.40396200  | -0.64176100 | -1.88079800 |
| H  | 5.33836500  | -0.71760500 | 3.42801800  |
| H  | 5.65553000  | 1.35505800  | 3.00147300  |
| H  | 1.12992300  | 4.84843400  | 4.07373900  |
| H  | 2.61490600  | 5.28547400  | 2.60630600  |
| H  | -0.54327500 | 0.77045300  | 6.22916600  |
| H  | 1.15645900  | -0.53006900 | 6.22499800  |
| H  | -1.13590100 | -4.57386900 | 3.71473400  |
| H  | -2.39876500 | -3.59361100 | 5.12540200  |
| H  | -5.80081200 | -1.74515800 | 2.22902600  |
| H  | -6.58138400 | -2.02363300 | 0.25909900  |

|   |             |             |             |
|---|-------------|-------------|-------------|
| H | -6.07944300 | 2.27514200  | -1.62825200 |
| H | -5.03490300 | 3.33210000  | -0.08165400 |
| H | -2.93499900 | -4.70557300 | -1.69676700 |
| H | -1.52238400 | -6.15981100 | -0.99249500 |
| H | 1.34292200  | -4.90639800 | -4.22496700 |
| H | 2.74751600  | -5.01148200 | -2.63833800 |
| H | 2.17458900  | -0.22240500 | -6.01093000 |
| H | 3.17583700  | 1.46148000  | -5.16411000 |
| H | -2.40597400 | 2.15541800  | -5.04168800 |
| H | -0.80580900 | 3.44225700  | -5.57621400 |
| H | -0.31021400 | 6.09114300  | -1.47034900 |
| H | -1.46475300 | 6.53042000  | 0.26605100  |
